# Supplementary material
Source: PubMed Central journal article supplement (PMC7174091)
Supplement: NIHMS1564216-supplement-Supplementary_material.pdf [file NIHMS1564216-supplement-Supplementary_material.pdf]

## **Appendix**

### **Supplement 1**

The EPA reclassified pesticides based on guidelines formed in 1986, 1996, 1999, and 2005. The 2005 classification contained five levels: “carcinogenic to humans,” “likely to be carcinogenic to humans,” “suggestive evidence of carcinogenic potential,” “inadequate information to assess carcinogenic potential,” and “not likely to be carcinogenic to humans.” The 1999 classification utilizes similar levels: “carcinogenic to humans,” “likely to be carcinogenic to humans,” “suggestive evidence of carcinogenicity, but not sufficient to assess human carcinogenic potential,” “data are inadequate for an assessment of human carcinogenic potential,” and “not likely to be carcinogenic to humans.” In 1996, there were three levels in the classification: “known/likely,” “cannot be determined,” and “not likely.” The 1986 classification used terminology similar to that of IARC: “group A – human carcinogen,” “group B – probable human carcinogen,” “group C – possible human carcinogen,” “group D – not classifiable as to human carcinogenicity,” and “group E – evidence of non-carcinogenicity for humans” . We selected pesticides that were Group C and above (1986 classification), "Known/likely" (1996 classification), and "Suggestive evidence of carcinogenicity, but not sufficient to assess human carcinogenic potential" and above (1999, 2005 classifications).

**Supplemental Table 1.** Associations between ALL and exposure to agricultural pesticide applications within 4000m of the residential address, by trimesters

| Chemical               | Exposed Cases<br>N=132 | Trimester 1           |                                     | Exposed Cases<br>N=132 | Trimester 2           |                                     | Exposed Cases<br>N=132 | Trimester 3           |                                     |
|------------------------|------------------------|-----------------------|-------------------------------------|------------------------|-----------------------|-------------------------------------|------------------------|-----------------------|-------------------------------------|
|                        |                        | Crude OR <sup>a</sup> | Single-pesticide model <sup>b</sup> |                        | Crude OR <sup>a</sup> | Single-pesticide model <sup>b</sup> |                        | Crude OR <sup>a</sup> | Single-pesticide model <sup>b</sup> |
| <b>Diuron</b>          | 61                     | 2.00                  | 1.96 (1.37, 2.8)                    | 67                     | 1.94                  | 1.87 (1.31, 2.68)                   | 62                     | 1.72                  | 1.65 (1.15, 2.36)                   |
| <b>Phosmet</b>         | 34                     | 1.85                  | 1.80 (1.20, 2.70)                   | 47                     | 1.87                  | 1.82 (1.24, 2.67)                   | 37                     | 1.55                  | 1.48 (1.00, 2.20)                   |
| <b>Propanil</b>        | 2                      | 1.34                  | 1.31 (0.32, 5.39)                   | 5                      | 2.83                  | 2.84 (1.14, 7.09)                   | 5                      | 2.59                  | 2.55 (1.02, 6.34)                   |
| <b>Kresoxim-methyl</b> | 8                      | 1.50                  | 1.42 (0.68, 2.98)                   | 12                     | 1.63                  | 1.53 (0.83, 2.84)                   | 15                     | 2.09                  | 1.94 (1.10, 3.42)                   |

<sup>a</sup>Adjusted for matching variable, birth year

<sup>b</sup>Adjusted for birth year, mother's race, and SES-index variable
